# Supplementary material for: Evidence of Tissue Repair in Human Donor Pancreas After Prolonged Duration of Stay in Intensive Care
Source: Oxford University Press journal article supplement (doi:10.2337/db19-0529), 2019-12-16
Supplement: db190529supplementarydata.xlsx [file db190529supplementarydata.xlsx]

## Sheet: Data donors
	Age	BMI	ICU	Pancreas weight	Relative pancreatic weight	Cause of Death	Gender	Vasopressin*	Insulin*
	(years)	(kg/m²)	(days)	(g)	(Pancreas weight/BMI)
1	15	27.6817	0	69.7	2.51791	Cerebrovascular/Stroke	M	Yes	Yes
2	18	19.025	0	42.5	2.23391	Anoxia	M	No	No
3	20	23.5457	0	80.1	3.40189	Trauma	M	Yes	No
4	21	21.4692	0	82.79	3.85623	Trauma	F	Yes	No
5	22	24.3375	0	98.4	4.04315	Trauma	M	Yes	No
6	24	22.6422	0	92.87	4.10163	Trauma	M	Yes	No
7	25	21.6049	0	57.93	2.68133	Trauma	M	Yes	No
8	27	39.1837	0	117.63	3.00202	Other	F	No	No
9	28	35.1562	0	109.91	3.12633	Other	F	No	No
10	29	24.8356	0	99	3.98621	Trauma	M	Yes	No
11	31	35.1112	0	105	2.9905	Trauma	M	Yes	No
12	31	25.0995	0	88.7	3.53393	Trauma	F	Yes	No
13	31	28.0763	0	148	5.27135	Cerebrovascular/Stroke	M	Yes	No
14	31	24.6181	0	95	3.85895	Cerebrovascular/Stroke	F	Yes	Yes
15	33	40.0367	0	101	2.52268	Other	F	No	No
16	34	24.2215	0	100	4.12857	Trauma	F	Yes	No
17	35	30.1038	0	113.8	3.78025	Trauma	M	Yes	Yes
18	35	20.5289	0	55.6	2.70837	Trauma	M	Yes	No
19	35	19.5312	0	117	5.9904	Cerebrovascular/Stroke	F	Yes	No
20	39	23.3747	0	109.57	4.68754	Trauma	M	Yes	No
21	39	30.3673	0	104.9	3.45437	Trauma	F	Yes	Yes
22	39	23.4586	0	121.5	5.17935	Other	F	No	No
23	41	21.6049	0	100	4.62857	Cerebrovascular/Stroke	M	Yes	Yes
24	41	23.4375	0	101	4.30933	Cerebrovascular/Stroke	F	Yes	Yes
25	41	27.6817	0	64.88	2.34379	Cerebrovascular/Stroke	F	Yes	No
26	42	29.6495	0	152	5.12656	Cerebrovascular/Stroke	M	Yes	No
27	42	31.1951	0	138	4.42377	Other	F	No	No
28	43	24.2215	0	118.84	4.90639	Cerebrovascular/Stroke	F	Yes	No
29	43	24.8356	0	143.05	5.75987	Cerebrovascular/Stroke	M	Yes	No
30	43	26.0375	0	68	2.61162	Anoxia	F	Yes	No
31	43	24.2215	0	118	4.87171	Cerebrovascular/Stroke	F	Yes	No
32	44	30.8642	0	108.4	3.51216	Trauma	M	Yes	No
33	45	24.8356	0	131	5.27468	Cerebrovascular/Stroke	M	Yes	No
34	45	30.1103	0	95	3.15507	Other	F	No	No
35	46	26.5432	0	85	3.20233	Trauma	M	Yes	No
36	46	27.5482	0	106	3.8478	Cerebrovascular/Stroke	F	Yes	Yes
37	47	21.1389	0	117	5.53483	Trauma	F	No	No
38	47	24.8016	0	137.7	5.55206	Cerebrovascular/Stroke	F	No	Yes
39	48	24.8356	0	89.16	3.59	Cerebrovascular/Stroke	M	No	Yes
40	48	22.4913	0	101.5	4.51285	Cerebrovascular/Stroke	F	Yes	No
41	48	30.8642	0	105.19	3.40816	Cerebrovascular/Stroke	M	No	No
42	48	31.25	0	108	3.456	Trauma	F	Yes	No
43	48	22.0386	0	93.09	4.22396	Cerebrovascular/Stroke	F	Yes	No
44	48	24.6914	0	120.6	4.8843	Trauma	M	Yes	No
45	48	23.4375	0	55.57	2.37099	Trauma	F	No	No
46	48	19.8352	0	96	4.83989	Cerebrovascular/Stroke	M	Yes	No
47	50	23.5102	0	99.47	4.23093	Trauma	F	Yes	Yes
48	50	26.5731	0	58.1	2.18642	Cerebrovascular/Stroke	F	No	No
49	17	20.2336	1	82.23	4.06404	Trauma	M	Yes	Yes
50	18	20.202	1	72.5	3.58875	Trauma	F	Yes	No
51	18	19.0311	1	76	3.99345	Trauma	M	No	Yes
52	19	21.9138	1	128.7	5.87301	Trauma	M	Yes	No
53	19	24.0493	1	130.3	5.41803	Trauma	M	Yes	No
54	19	24.8356	1	96.09	3.86904	Other	M	Yes	No
55	21	33.3061	1	117.24	3.52007	Trauma	M	Yes	No
56	21	24.2215	1	102	4.21114	Trauma	M	Yes	No
57	22	24.6914	1	93.46	3.78513	Trauma	M	Yes	No
58	23	19.7239	1	95.2	4.82664	Anoxia	F	Yes	Yes
59	23	19.1001	1	77.91	4.07904	Trauma	F	Yes	Yes
60	24	25.9516	1	80.73	3.1108	Anoxia	F	Yes	No
61	25	23.3747	1	120	5.13375	Trauma	M	Yes	No
62	26	22.8624	1	100	4.374	Trauma	F	Yes	Yes
63	27	30.2469	1	105.23	3.47903	Trauma	M	Yes	No
64	27	27.5	1	116	4.21818	Cerebrovascular/Stroke	M	Yes	No
65	27	19.5918	1	79	4.03229	Anoxia	F	Yes	No
66	28	21.9138	1	87.12	3.97558	Trauma	F	Yes	No
67	28	21.2245	1	125	5.88942	Trauma	F	Yes	No
68	29	21.2953	1	58	2.72361	Anoxia	F	Yes	No
69	30	23.3747	1	118.1	5.05247	Cerebrovascular/Stroke	M	Yes	No
70	31	21.6049	1	74.59	3.45245	Trauma	M	Yes	No
71	31	29.3878	1	151.39	5.15147	Cerebrovascular/Stroke	F	Yes	No
72	32	24.2215	1	116.26	4.79988	Anoxia	M	No	No
73	33	25.464	1	129.8	5.09739	Anoxia	M	Yes	Yes
74	34	24.9307	1	114	4.57267	Cerebrovascular/Stroke	M	Yes	Yes
75	35	25.2493	1	112	4.43576	Cerebrovascular/Stroke	F	Yes	Yes
76	36	33.9506	1	77	2.268	Trauma	M	Yes	No
77	36	23.3747	1	92	3.93588	Cerebrovascular/Stroke	M	Yes	No
78	38	24.6181	1	110	4.46826	Trauma	M	Yes	No
79	38	24.6914	1	116	4.698	Trauma	M	Yes	No
80	38	24.0741	1	143.6	5.96492	Trauma	M	Yes	No
81	38	21.9774	1	111.25	5.06203	Trauma	M	Yes	No
82	38	23.1241	1	82.94	3.58674	Trauma	M	Yes	No
83	38	24.2215	1	155	6.39929	Anoxia	M	No	No
84	39	31.0204	1	112.1	3.61375	Cerebrovascular/Stroke	F	No	No
85	39	22.2656	1	108	4.85053	Cerebrovascular/Stroke	F	Yes	No
86	39	29.4118	1	76.2	2.5908	Cerebrovascular/Stroke	F	Yes	No
87	40	31.5617	1	105.57	3.34488	Trauma	M	Yes	No
88	40	24.6914	1	100	4.05	Trauma	M	No	No
89	40	27.3588	1	91	3.32616	Trauma	F	Yes	No
90	41	27.6817	1	118	4.26275	Cerebrovascular/Stroke	F	No	No
91	41	33.91	1	116.9	3.44736	Cerebrovascular/Stroke	F	No	No
92	41	24.2215	1	70.07	2.89289	Cerebrovascular/Stroke	F	Yes	No
93	41	22.9854	1	117.07	5.09323	Anoxia	F	Yes	No
94	41	22.8571	1	103.7	4.53687	Cerebrovascular/Stroke	M	Yes	No
95	42	25.1953	1	128.5	5.10016	Cerebrovascular/Stroke	M	Yes	Yes
96	42	22.8571	1	85.6	3.745	Trauma	F	Yes	No
97	42	23.6614	1	121.49	5.13451	Trauma	M	Yes	No
98	43	21.6049	1	71.82	3.32424	Cerebrovascular/Stroke	M	Yes	Yes
99	43	23.1481	1	144.23	6.23074	Cerebrovascular/Stroke	M	Yes	No
100	43	27.7778	1	110	3.96	Trauma	M	Yes	No
101	43	22.9854	1	104	4.52461	Cerebrovascular/Stroke	F	Yes	No
102	43	26.1224	1	139.94	5.35708	Cerebrovascular/Stroke	M	Yes	No
103	43	26.6728	1	80.4	3.01431	Cerebrovascular/Stroke	F	Yes	No
104	44	23.5457	1	93	3.94976	Cerebrovascular/Stroke	M	Yes	No
105	44	30.1896	1	170	5.63108	Cerebrovascular/Stroke	M	Yes	No
106	44	25.9516	1	90.2	3.47571	Cerebrovascular/Stroke	F	Yes	No
107	44	24.7676	1	73.6	2.97163	Cerebrovascular/Stroke	F	Yes	No
108	44	22.8571	1	109	4.76875	Cerebrovascular/Stroke	F	No	Yes
109	44	20.7612	1	96.7	4.65772	Cerebrovascular/Stroke	F	Yes	Yes
110	45	25.0135	1	70.3	2.81048	Trauma	M	Yes	No
111	45	21.9138	1	87.5	3.99292	Trauma	M	Yes	Yes
112	46	20.7612	1	92.5	4.45542	Cerebrovascular/Stroke	F	Yes	Yes
113	46	27.4717	1	119.8	4.36085	Trauma	M	Yes	No
114	46	22.8571	1	95.77	4.18994	Cerebrovascular/Stroke	M	Yes	No
115	46	19.487	1	89.89	4.61283	Trauma	F	Yes	No
116	46	19.5312	1	86	4.4032	Trauma	F	Yes	No
117	46	19.3772	1	106	5.47036	Cerebrovascular/Stroke	F	Yes	No
118	46	25.2493	1	109	4.31695	Anoxia	M	Yes	No
119	47	34.6746	1	106.89	3.08266	Cerebrovascular/Stroke	F	Yes	No
120	47	29.2184	1	162.92	5.57594	Trauma	M	No	No
121	47	22.0932	1	107.52	4.86666	Cerebrovascular/Stroke	F	No	No
122	47	25.7117	1	111.8	4.34822	Trauma	F	Yes	No
123	47	30.1162	1	92	3.05483	Anoxia	F	Yes	No
124	47	27.7575	1	106	3.81879	Trauma	M	Yes	No
125	47	23.1481	1	77.7	3.35664	Cerebrovascular/Stroke	F	Yes	Yes
126	48	28.5156	1	108.9	3.81896	Cerebrovascular/Stroke	F	Yes	Yes
127	49	29.321	1	159.96	5.45548	Cerebrovascular/Stroke	M	Yes	No
128	49	27.7551	1	100.38	3.61663	Cerebrovascular/Stroke	M	Yes	Yes
129	49	34.6021	1	94.94	2.74377	Trauma	M	Yes	Yes
130	49	23.8884	1	165	6.90711	Cerebrovascular/Stroke	M	Yes	No
131	49	20.0288	1	71	3.54489	Anoxia	F	Yes	No
132	49	24.6914	1	138.3	5.60115	Cerebrovascular/Stroke	M	No	No
133	49	21.9138	1	91.31	4.16678	Trauma	M	Yes	Yes
134	50	26.2346	1	83.8	3.19426	Cerebrovascular/Stroke	M	Yes	No
135	50	24.4898	1	94.11	3.84283	Trauma	F	Yes	Yes
136	50	24.6914	1	113	4.5765	Cerebrovascular/Stroke	M	Yes	No
137	50	22.0386	1	80	3.63	Trauma	F	Yes	No
138	50	21.2585	1	73.92	3.4772	Cerebrovascular/Stroke	F	No	No
139	50	35.1562	1	101.7	2.8928	Cerebrovascular/Stroke	F	Yes	No
140	18	26.1224	2	78.45	3.00316	Anoxia	F	No	No
141	19	19.5312	2	54.2	2.77504	Anoxia	F	Yes	No
142	19	25.0593	2	77.19	3.08029	Trauma	F	Yes	No
143	20	20.4529	2	77.57	3.79262	Trauma	M	Yes	No
144	20	19.8685	2	98.32	4.94853	Trauma	M	No	Yes
145	23	21.6049	2	102	4.72114	Anoxia	M	No	No
146	23	23.3747	2	84.41	3.61117	Trauma	M	Yes	No
147	24	24.8356	2	94.94	3.82273	Trauma	M	No	No
148	27	25.565	2	104.77	4.09819	Trauma	M	No	Yes
149	27	20.202	2	45.73	2.26363	Trauma	M	Yes	No
150	29	23.8498	2	73.48	3.08095	Trauma	M	Yes	No
151	30	23.3067	2	104	4.46224	Anoxia	M	Yes	No
152	30	24.6914	2	144.6	5.8563	Trauma	M	Yes	No
153	32	30.4709	2	175.6	5.76287	Trauma	M	Yes	No
154	32	26.1224	2	97.98	3.7508	Trauma	M	No	No
155	32	23.7228	2	87.1	3.67157	Cerebrovascular/Stroke	M	Yes	No
156	34	27.7551	2	84.12	3.03079	Trauma	M	No	No
157	35	24.8356	2	123.1	4.95659	Anoxia	M	No	No
158	35	23.3747	2	100	4.27813	Anoxia	M	No	No
159	36	24.6914	2	78.07	3.16183	Anoxia	M	Yes	No
160	36	27.0842	2	77	2.84299	Cerebrovascular/Stroke	M	Yes	No
161	37	22.1607	2	88.4	3.98905	Trauma	M	Yes	No
162	38	24.1617	2	94.57	3.91404	Cerebrovascular/Stroke	M	Yes	Yes
163	38	23.5294	2	56.01	2.38042	Other	F	Yes	Yes
164	38	25.7117	2	112	4.356	Anoxia	M	Yes	No
165	39	23.0388	2	85	3.68944	Anoxia	M	No	No
166	39	23.8751	2	87	3.64396	Cerebrovascular/Stroke	F	Yes	No
167	39	26.8274	2	107.2	3.99591	Trauma	M	Yes	No
168	40	27.0416	2	104.26	3.85553	Cerebrovascular/Stroke	F	Yes	No
169	40	21.2585	2	67.3	3.16579	Cerebrovascular/Stroke	F	Yes	No
170	41	23.4375	2	101.16	4.31616	Cerebrovascular/Stroke	F	Yes	Yes
171	41	26.1224	2	118.75	4.5459	Anoxia	M	Yes	Yes
172	42	29.3848	2	98.76	3.36093	Trauma	M	Yes	Yes
173	42	21.9138	2	78.1	3.56396	Cerebrovascular/Stroke	M	Yes	No
174	42	32.6531	2	80.32	2.4598	Cerebrovascular/Stroke	F	Yes	No
175	42	27.7575	2	166.48	5.99766	Cerebrovascular/Stroke	M	Yes	Yes
176	42	22.3081	2	92.9	4.1644	Anoxia	F	Yes	No
177	43	24.6914	2	102.4	4.1472	Cerebrovascular/Stroke	M	Yes	No
178	43	29.3658	2	138.38	4.71229	Cerebrovascular/Stroke	M	No	No
179	44	37.037	2	111	2.997	Cerebrovascular/Stroke	F	Yes	No
180	44	27.7551	2	117.8	4.24426	Cerebrovascular/Stroke	M	Yes	No
181	44	32.4074	2	133.46	4.11819	Cerebrovascular/Stroke	M	Yes	No
182	45	22.4913	2	69.55	3.0923	Other	F	Yes	No
183	45	23.2912	2	100.87	4.33081	Cerebrovascular/Stroke	M	Yes	Yes
184	45	26.1224	2	116	4.44062	Trauma	M	Yes	No
185	46	32.4905	2	102.14	3.14368	Trauma	M	Yes	No
186	46	27.4115	2	90	3.28329	Cerebrovascular/Stroke	M	No	Yes
187	46	23.9591	2	135.89	5.67175	Cerebrovascular/Stroke	M	Yes	Yes
188	46	24.6914	2	130.35	5.27918	Trauma	M	No	No
189	46	27.3674	2	104.7	3.82572	Cerebrovascular/Stroke	M	Yes	No
190	47	21.6049	2	81.97	3.79404	Anoxia	M	Yes	No
191	48	39.0625	2	88.8	2.27328	Cerebrovascular/Stroke	F	Yes	No
192	48	30.8642	2	141.63	4.58881	Cerebrovascular/Stroke	M	Yes	Yes
193	48	29.2184	2	114.56	3.92082	Trauma	M	Yes	No
194	48	29.8606	2	156.5	5.24103	Trauma	M	Yes	No
195	48	30.8642	2	121	3.9204	Cerebrovascular/Stroke	M	No	No
196	48	19.5312	2	78	3.9936	Cerebrovascular/Stroke	F	Yes	No
197	48	22.0386	2	80.07	3.63318	Cerebrovascular/Stroke	F	Yes	No
198	48	22.0386	2	60.4	2.74065	Cerebrovascular/Stroke	F	Yes	Yes
199	48	30.4218	2	119.01	3.91199	Cerebrovascular/Stroke	M	No	Yes
200	49	24.1517	2	118.97	4.92595	Cerebrovascular/Stroke	F	Yes	No
201	49	26.3158	2	109	4.142	Anoxia	M	Yes	No
202	49	26.1224	2	103	3.94297	Cerebrovascular/Stroke	F	Yes	No
203	49	22.8571	2	77.7	3.39938	Trauma	M	Yes	No
204	49	21.2245	2	115.7	5.45125	Cerebrovascular/Stroke	F	Yes	Yes
205	49	24.4444	2	87.47	3.57832	Cerebrovascular/Stroke	F	Yes	No
206	50	24.3865	2	79.41	3.25631	Cerebrovascular/Stroke	F	Yes	Yes
207	50	24.8163	2	100.4	4.04572	Cerebrovascular/Stroke	F	Yes	No
208	50	24.8356	2	114.89	4.62601	Cerebrovascular/Stroke	M	Yes	No
209	50	27.7551	2	149.65	5.3918	Cerebrovascular/Stroke	M	No	No
210	50	24.6914	2	101.6	4.1148	Trauma	M	Yes	No
211	50	25.7117	2	115	4.47268	Cerebrovascular/Stroke	F	Yes	No
212	50	25.0593	2	107.09	4.27346	Cerebrovascular/Stroke	M	Yes	Yes
213	50	30.4709	2	154.43	5.06811	Trauma	M	Yes	No
214	16	19.9792	3	53.17	2.66127	Anoxia	F	Yes	Yes
215	17	20.7612	3	53.4	2.5721	Anoxia	M	Yes	No
216	20	23.5457	3	116.86	4.96311	Trauma	M	No	No
217	25	32.6531	3	160.6	4.91837	Cerebrovascular/Stroke	F	No	No
218	25	27.3438	3	85.8	3.13783	Trauma	F	Yes	No
219	25	20.0617	3	72.24	3.60089	Trauma	M	Yes	No
220	26	19.9445	3	100	5.01391	Cerebrovascular/Stroke	M	No	No
221	27	23.5294	3	94.63	4.02177	Anoxia	F	Yes	No
222	28	24.9836	3	100	4.00263	Trauma	M	No	No
223	29	26.2346	3	118.35	4.51122	Anoxia	M	No	No
224	34	21.6049	3	122.2	5.65611	Anoxia	M	No	No
225	35	23.1481	3	114.71	4.95547	Trauma	M	Yes	No
226	36	20.5191	3	89	4.33742	Anoxia	F	Yes	No
227	40	22.5	3	83.1	3.69333	Trauma	M	No	No
228	40	26.2346	3	132.35	5.04487	Cerebrovascular/Stroke	M	No	No
229	40	28.7197	3	99	3.44711	Cerebrovascular/Stroke	F	Yes	No
230	40	23.8751	3	98.04	4.10637	Anoxia	F	Yes	No
231	42	24.4898	3	87.5	3.57292	Anoxia	F	No	No
232	43	30.8463	3	105	3.40398	Cerebrovascular/Stroke	F	Yes	Yes
233	44	27.4077	3	62	2.26214	Anoxia	F	Yes	No
234	44	24.7676	3	87.31	3.52517	Cerebrovascular/Stroke	F	Yes	No
235	45	27.7778	3	84.18	3.03048	Anoxia	M	Yes	No
236	46	22.0386	3	76.55	3.47346	Cerebrovascular/Stroke	F	Yes	No
237	47	22.8571	3	86.1	3.76687	Cerebrovascular/Stroke	M	Yes	No
238	47	24.2215	3	92.8	3.83131	Cerebrovascular/Stroke	F	Yes	No
239	47	23.8751	3	82.05	3.43663	Trauma	F	Yes	No
240	47	26.2346	3	86	3.27812	Cerebrovascular/Stroke	M	Yes	Yes
241	47	25.3906	3	127.57	5.0243	Cerebrovascular/Stroke	F	No	Yes
242	47	28.4005	3	100	3.52106	Trauma	M	Yes	No
243	47	20.202	3	78.72	3.89664	Cerebrovascular/Stroke	F	Yes	No
244	47	23.8884	3	106.5	4.45822	Trauma	M	Yes	No
245	48	21.4844	3	64.9	3.0208	Trauma	F	Yes	No
246	48	33.9506	3	110	3.24	Other	M	Yes	Yes
247	48	37.037	3	67	1.809	Trauma	M	Yes	No
248	49	22.0386	3	68.83	3.12316	Anoxia	F	Yes	No
249	49	26.2966	3	135	5.13375	Trauma	M	Yes	No
250	50	27.3438	3	80.68	2.95058	Cerebrovascular/Stroke	F	Yes	Yes
251	18	21.6049	4	84.3	3.90189	Anoxia	M	Yes	No
252	19	33.9506	4	83.93	2.47212	Trauma	M	No	Yes
253	22	20.9877	4	61.4	2.92553	Trauma	M	Yes	No
254	24	26.1224	4	110.44	4.22778	Cerebrovascular/Stroke	M	No	Yes
255	24	22.5306	4	65.44	2.90449	Anoxia	F	Yes	No
256	26	24.9307	4	82.1	3.29312	Trauma	M	Yes	No
257	26	31.8878	4	107.43	3.369	Trauma	M	Yes	Yes
258	28	24.3767	4	109	4.47148	Cerebrovascular/Stroke	M	Yes	No
259	29	20.2812	4	68.48	3.37652	Anoxia	F	Yes	No
260	29	32.6531	4	126.2	3.86488	Anoxia	F	No	No
261	31	26.2966	4	108.24	4.11613	Anoxia	M	No	Yes
262	32	23.9869	4	97.9	4.0814	Anoxia	M	No	No
263	33	21.9138	4	78.3	3.57309	Cerebrovascular/Stroke	M	No	No
264	33	35.2617	4	101	2.8643	Other	F	Yes	No
265	35	23.1481	4	111	4.7952	Anoxia	M	Yes	No
266	36	22.5981	4	117.25	5.18848	Anoxia	M	Yes	No
267	37	24.2382	4	91	3.7544	Anoxia	M	Yes	Yes
268	38	21.4844	4	73.83	3.43645	Trauma	F	Yes	No
269	38	27.7778	4	105	3.78	Trauma	M	Yes	No
270	39	29.2184	4	99.1	3.3917	Anoxia	M	No	No
271	41	24.4898	4	104.07	4.24953	Cerebrovascular/Stroke	M	No	No
272	41	22.5981	4	69.8	3.08875	Anoxia	M	Yes	No
273	41	28.0863	4	134.7	4.79594	Cerebrovascular/Stroke	M	Yes	No
274	44	24.6914	4	116	4.698	Trauma	M	Yes	No
275	45	24.8356	4	123.7	4.98074	Cerebrovascular/Stroke	M	Yes	No
276	45	24.5693	4	95	3.86661	Trauma	M	Yes	No
277	46	26.8274	4	102	3.80208	Trauma	M	No	No
278	47	27.3438	4	68	2.48686	Cerebrovascular/Stroke	F	Yes	No
279	47	25.7371	4	109.98	4.27321	Trauma	M	Yes	No
280	48	26.2966	4	144.5	5.49501	Trauma	M	Yes	No
281	48	28.2284	4	99.9	3.53899	Cerebrovascular/Stroke	F	No	No
282	48	23.4375	4	98.2	4.18987	Anoxia	M	No	No
283	48	27.4406	4	118.94	4.33445	Anoxia	M	Yes	No
284	49	26.1224	4	128.05	4.90191	Cerebrovascular/Stroke	M	No	No
285	49	24.2215	4	147.5	6.08964	Anoxia	M	Yes	No
286	50	23.8751	4	94.9	3.97485	Cerebrovascular/Stroke	F	Yes	No
287	50	29.3878	4	96	3.26667	Anoxia	F	Yes	No
288	50	24.4646	4	70	2.86128	Trauma	F	Yes	No
289	23	21.2245	5	100	4.71154	Anoxia	M	Yes	Yes
290	24	18.2262	5	86.94	4.77004	Other	F	Yes	Yes
291	28	23.5666	5	105	4.45545	Trauma	M	Yes	No
292	29	23.1473	5	104.76	4.52581	Anoxia	F	No	No
293	37	23.8751	5	60.84	2.54826	Cerebrovascular/Stroke	F	Yes	No
294	37	29.4118	5	101	3.434	Anoxia	F	No	No
295	39	23.1481	5	110	4.752	Anoxia	M	No	No
296	41	21.6049	5	102	4.72114	Anoxia	M	No	No
297	41	23.5479	5	100	4.24667	Anoxia	M	No	No
298	44	26.2976	5	110	4.18289	Anoxia	M	No	No
299	45	22.8395	5	105.58	4.62269	Trauma	M	Yes	No
300	46	34.6021	5	120.78	3.49054	Cerebrovascular/Stroke	M	Yes	No
301	47	23.1241	5	58.9	2.54713	Anoxia	M	Yes	No
302	48	29.3878	5	92.87	3.16016	Trauma	M	Yes	Yes
303	48	26.2346	5	134	5.10776	Cerebrovascular/Stroke	M	Yes	No
304	48	23.8751	5	69	2.89004	Other	F	Yes	No
305	48	25.7117	5	110.93	4.31438	Anoxia	F	No	No
306	49	23.1405	5	107	4.62393	Cerebrovascular/Stroke	F	Yes	No
307	50	20.9572	5	73.8	3.52147	Trauma	F	Yes	No
308	50	26.1224	5	105.76	4.04863	Cerebrovascular/Stroke	M	Yes	No
309	16	21.2245	6	76	3.58077	Trauma	M	Yes	No
310	20	22.4913	6	50.6	2.24975	Anoxia	F	No	No
311	23	21.5648	6	68.69	3.18529	Trauma	M	Yes	No
312	30	22.8571	6	105.73	4.62569	Anoxia	F	Yes	No
313	36	24.2215	6	112.6	4.64877	Cerebrovascular/Stroke	F	Yes	No
314	42	28.6851	6	89.93	3.13507	Cerebrovascular/Stroke	F	Yes	Yes
315	43	24.4898	6	116.9	4.77342	Trauma	M	Yes	No
316	46	30.4218	6	99.3	3.2641	Cerebrovascular/Stroke	F	Yes	Yes
317	47	23.6614	6	76.09	3.21578	Cerebrovascular/Stroke	F	Yes	No
318	48	31.0204	6	97.4	3.13987	Cerebrovascular/Stroke	F	Yes	No
319	48	22.4913	6	138.6	6.16237	Cerebrovascular/Stroke	F	Yes	No
320	49	21.4844	6	190.98	8.88925	Cerebrovascular/Stroke	F	Yes	No
321	49	24.3072	6	116.56	4.79528	Cerebrovascular/Stroke	M	No	No
322	49	41.5225	6	93.3	2.24697	Cerebrovascular/Stroke	F	Yes	No
323	50	26.2346	6	110	4.19294	Cerebrovascular/Stroke	M	Yes	No
324	17	36.7309	7	77.44	2.1083	Cerebrovascular/Stroke	F	Yes	No
325	19	21.9138	7	79.32	3.61964	Trauma	M	Yes	No
326	22	23.6713	7	104.2	4.40196	Trauma	M	No	No
327	22	34.6021	7	101.2	2.92468	Anoxia	F	Yes	Yes
328	24	22.8571	7	82.49	3.60894	Trauma	M	Yes	No
329	27	26.5432	7	112.2	4.22707	Cerebrovascular/Stroke	M	No	No
330	28	27.4598	7	94.81	3.45268	Anoxia	M	Yes	No
331	29	21.9138	7	96.3	4.39449	Trauma	M	No	No
332	33	26.2966	7	146.04	5.55358	Cerebrovascular/Stroke	M	Yes	No
333	34	24.5435	7	86.43	3.52151	Trauma	M	Yes	No
334	35	31.1419	7	100.2	3.21753	Trauma	F	Yes	No
335	36	25.4581	7	78.08	3.067	Cerebrovascular/Stroke	F	Yes	No
336	37	32.872	7	90.05	2.73942	Trauma	M	Yes	No
337	39	20.0617	7	95.91	4.78074	Trauma	M	No	Yes
338	41	25.9516	7	117.37	4.52266	Trauma	M	No	No
339	43	27.6817	7	70.6	2.55042	Cerebrovascular/Stroke	F	Yes	Yes
340	44	22.8571	7	126.87	5.55056	Cerebrovascular/Stroke	F	Yes	Yes
341	49	22.0386	7	92.51	4.19764	Cerebrovascular/Stroke	F	Yes	Yes
342	49	20.2812	7	95.8	4.72358	Trauma	M	Yes	No
343	49	26.9896	7	89.27	3.30757	Anoxia	F	Yes	Yes
344	20	22.4913	8	97.4	4.33055	Trauma	F	No	No
345	21	24.1517	8	90.17	3.73349	Trauma	M	Yes	No
346	31	29.321	8	123.7	4.21882	Cerebrovascular/Stroke	M	No	No
347	37	30.111	8	97.61	3.24167	Cerebrovascular/Stroke	F	Yes	No
348	42	24.6914	8	120.75	4.89037	Cerebrovascular/Stroke	M	Yes	No
349	42	19.5312	8	76.54	3.91885	Cerebrovascular/Stroke	F	Yes	No
350	17	22.3954	9	75.7	3.38016	Trauma	M	Yes	Yes
351	27	27.7551	9	92	3.31471	Trauma	M	Yes	Yes
352	33	20.202	9	100.5	4.97475	Cerebrovascular/Stroke	F	Yes	No
353	40	27.3438	9	82.7	3.02446	Anoxia	F	Yes	No
354	45	34.4753	9	94	2.72659	Other	F	Yes	No
355	45	26.5731	9	84.6	3.18367	Cerebrovascular/Stroke	F	Yes	No
356	46	20.7612	9	114	5.491	Cerebrovascular/Stroke	F	No	No
357	22	23.8751	10	74	3.09946	Trauma	F	Yes	Yes
358	22	26.6728	10	53	1.98705	Trauma	M	No	No
359	32	22.2063	10	69.67	3.13739	Cerebrovascular/Stroke	F	Yes	No
360	38	20.0617	10	119.6	5.9616	Anoxia	M	No	No
361	41	21.7993	10	86.01	3.94554	Anoxia	F	No	No
362	43	26.1224	10	93	3.56016	Trauma	M	Yes	No
363	43	21.5139	10	91	4.22983	Cerebrovascular/Stroke	F	Yes	No
364	44	27.0416	10	120	4.4376	Cerebrovascular/Stroke	F	Yes	No
365	46	24.977	10	90.77	3.63414	Cerebrovascular/Stroke	F	Yes	No
366	48	26.1224	10	111	4.24922	Other	M	No	No
367	50	25.3906	10	97.62	3.84473	Anoxia	F	No	No
368	26	23.1481	11	91.87	3.96878	Trauma	M	Yes	No
369	29	20.7756	11	86.4	4.15872	Trauma	M	Yes	No
370	31	23.1481	11	95	4.104	Trauma	M	Yes	No
371	39	24.8356	11	115.2	4.63849	Anoxia	M	Yes	No
372	41	26.2346	11	102	3.888	Trauma	M	Yes	No
373	41	25.3906	11	67.1	2.64271	Trauma	F	No	No
374	49	23.8884	11	125.07	5.23559	Trauma	M	Yes	Yes
375	49	35.0128	11	88.22	2.51965	Trauma	M	No	No
376	49	26.3465	11	109.79	4.16716	Cerebrovascular/Stroke	F	Yes	No
377	38	20.202	12	112.46	5.56677	Cerebrovascular/Stroke	F	Yes	No
378	40	41.0156	12	96.14	2.34398	Cerebrovascular/Stroke	F	No	No
379	46	22.8571	12	52.8	2.31	Cerebrovascular/Stroke	M	Yes	Yes
380	47	20.7612	12	116.37	5.60516	Cerebrovascular/Stroke	M	No	No
381	50	22.5827	12	107.48	4.75939	Cerebrovascular/Stroke	F	Yes	Yes
382	23	26.4236	13	104.3	3.94723	Trauma	M	Yes	No
383	36	24.9307	13	106.62	4.27665	Trauma	M	Yes	No
384	43	24.2215	13	119.4	4.92951	Cerebrovascular/Stroke	F	Yes	No
385	45	20.202	13	106.8	5.2866	Cerebrovascular/Stroke	F	Yes	No
386	49	24.4898	13	84.2	3.43817	Cerebrovascular/Stroke	F	Yes	No
387	18	18.3655	14	69	3.75705	Anoxia	F	No	No
388	43	24.2215	14	93	3.83957	Cerebrovascular/Stroke	F	Yes	No
389	43	22.0932	14	86	3.89261	Cerebrovascular/Stroke	M	No	No
390	50	27.7551	14	99	3.56691	Cerebrovascular/Stroke	F	Yes	Yes
391	33	22.7583	15	87.11	3.82761	Cerebrovascular/Stroke	F	Yes	No
392	37	22.8571	15	114.2	4.99625	Trauma	M	Yes	No
393	40	22.4913	15	74.51	3.31283	Cerebrovascular/Stroke	F	Yes	No
394	45	15.625	15	67.63	4.32832	Cerebrovascular/Stroke	F	No	No
*'No' is based on information provided in the donor form, which may be incomplete
